# Supplementary material
Source: PubMed Central journal article supplement (PMC5028908)
Supplement: Supp_Figure1.pdf [file Supp_Figure1.pdf]

## Supplementary Data

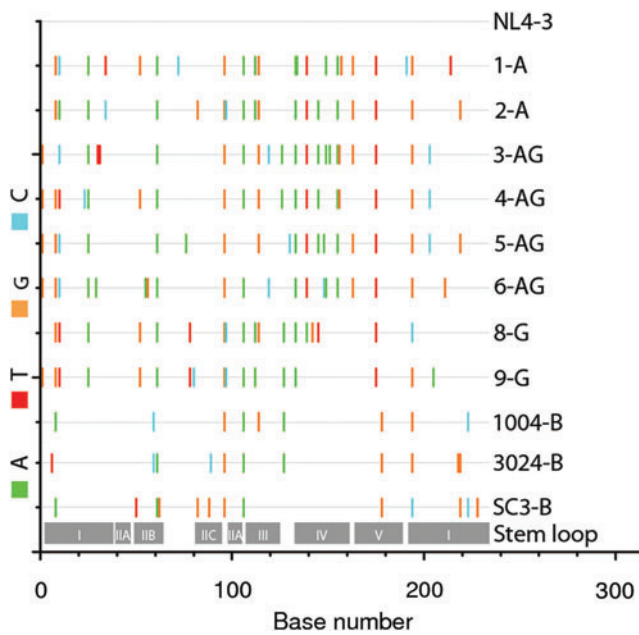

**SUPPLEMENTARY FIG. S1.** Highlighter plot of selected RRE sequences. The sequences of 234-nt RREs from 12 selected viruses were aligned to the RRE from NL4-3. *Colored bars* denote the position of nucleotide differences from the reference. The *color key* is shown on the y-axis. The *gray bars* correspond to those regions that would fold to form a five stem-loop structure. (Modified from Highlighter for Nucleotide Sequences v2.2.3.<sup>65</sup>) RRE, Rev response element.
