# Supplementary material
Source: PubMed Central journal article supplement (PMC5028908)
Supplement: Supp_Table1.pdf [file Supp_Table1.pdf]

SUPPLEMENTARY TABLE S1. PLASMID CONSTRUCTS USED IN THESE EXPERIMENTS

| <i>Virus</i> | <i>Type of construct</i>                      | <i>Plasmid number</i> |
|--------------|-----------------------------------------------|-----------------------|
| 1-A          | pTR167 (RRE-) ( <i>nef</i> -) (selected RRE+) | HR5208                |
|              | CMV-Rev                                       | HR5209                |
|              | CMV-HA-Rev                                    | HR5271                |
| 2-A          | pTR167 (RRE-) ( <i>nef</i> -) (selected RRE+) | HR5198                |
|              | CMV-Rev                                       | HR5182                |
|              | CMV-HA-Rev                                    | HR5272                |
| 3-AG         | pTR167 (RRE-) ( <i>nef</i> -) (selected RRE+) | HR5189                |
|              | CMV-Rev                                       | HR5183                |
|              | CMV-HA-Rev                                    | HR5274                |
| 4-AG         | pTR167 (RRE-) ( <i>nef</i> -) (selected RRE+) | HR5191                |
|              | CMV-Rev                                       | HR5185                |
|              | CMV-HA-Rev                                    | HR5275                |
| 5-AG         | pTR167 (RRE-) ( <i>nef</i> -) (selected RRE+) | HR5199                |
|              | CMV-Rev                                       | HR5202                |
|              | CMV-HA-Rev                                    | HR5276                |
| 6-AG         | pTR167 (RRE-) ( <i>nef</i> -) (selected RRE+) | HR5193                |
|              | CMV-Rev                                       | HR5203                |
|              | CMV-HA-Rev                                    | HR5277                |
| 8-G          | pTR167 (RRE-) ( <i>nef</i> -) (selected RRE+) | HR5200                |
|              | CMV-Rev                                       | HR5204                |
|              | CMV-HA-Rev                                    | HR5279                |
| 9-G          | pTR167 (RRE-) ( <i>nef</i> -) (selected RRE+) | HR5196                |
|              | CMV-Rev                                       | HR5187                |
|              | CMV-HA-Rev                                    | HR5281                |
| 1004-B       | pTR167 (RRE-) ( <i>nef</i> -) (selected RRE+) | HR5172                |
| 3024-B       | CMV-Rev                                       | HR4428                |
|              | pTR167 (RRE-) ( <i>nef</i> -) (selected RRE+) | HR5176                |
|              | CMV-Rev                                       | HR4432                |
| SC3-B        | CMV-HA-Rev                                    | HR5283                |
|              | pTR167 (RRE-) ( <i>nef</i> -) (selected RRE+) | HR5177                |
|              | CMV-Rev                                       | HR4776                |
| NL4-3        | pTR167 (RRE-) ( <i>nef</i> -) (selected RRE+) | HR5195                |
|              | CMV-Rev                                       | HR5186                |
|              | CMV-HA-Rev                                    | HR5269                |

The pHRXXXX plasmid archive numbers for the constructs used in this study are listed.
